# Supplementary material
Source: Springer Nature journal article supplement (https://www.springermedizin.de/resource/supplementary/12933_2013_670_MOESM3_ESM.pdf/9539090)

**Aleglitazar**

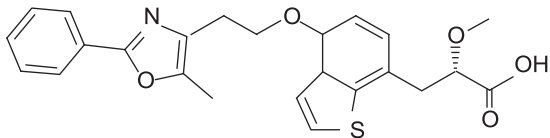

**GFT505**

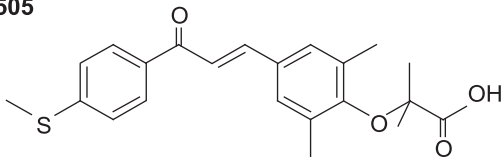

**K-877**

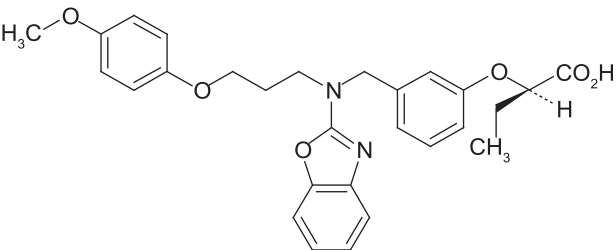

**Fenofibrate**

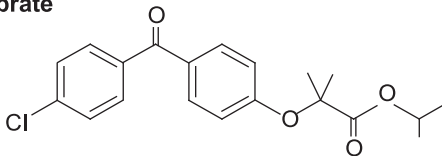

Supplement: MOESM3 [file 9539090]
